# Supplementary material for: Degradation of tetracycline by visible light using Ca2Nb2O7 composite oxides with perovskite and pyrochlore sub-crystalline phases
Source: Royal Society of Chemistry journal article supplement (doi:10.1039/d4ce00044g), 2024-01-01
Supplement: d4ce00044g1.pdf [file d4ce00044g1.pdf]

## Electronic Supplementary Information

### Degradation of tetracycline by visible light using $\text{Ca}_2\text{Nb}_2\text{O}_7$ composite oxides with perovskite and pyrochlore sub-crystalline phases

Junwei Xu<sup>1, 2#</sup>, Chengxin Lu<sup>2#</sup>, Xianfeng Zhang<sup>3</sup>, Rumeng Ouyang<sup>2</sup>, Xiuzhong Fang<sup>2</sup>, Xianglan Xu<sup>2</sup>, Xiang Wang<sup>2\*</sup>

1. *Department of Applied Chemistry, Jiang Xi Academy of Sciences, Nanchang, 330096, China.*
2. *Key Laboratory of Jiangxi Province for Environment and Energy Catalysis, School of Chemistry and Chemical Engineering, Nanchang University, Nanchang, 330031, China.*
3. *Anhui Silicon Based New Materials Engineering Research Center, School of Material and Chemical Engineering, Bengbu University, Bengbu, 233030, China.*

\* *Corresponding author. Xujunwei0102@163.com; [xwang23@ncu.edu.cn](mailto:xwang23@ncu.edu.cn)*

# These authors contributed equally to this work.

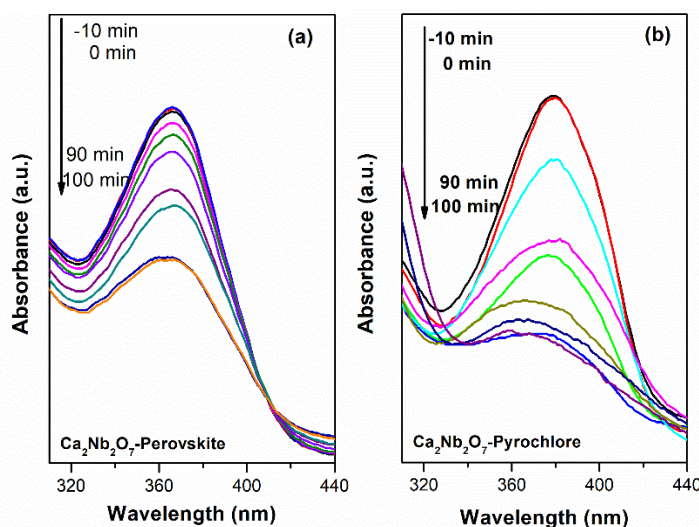

**Fig. S1** The absorption spectra of tetracycline before and after degradation by the two catalysts (a)  $\text{Ca}_2\text{Nb}_2\text{O}_7$ -perovskite and (b)  $\text{Ca}_2\text{Nb}_2\text{O}_7$ -pyrochlore.

**Table S1** The relevant ESR quantitative results.

| Samples    | DMPO-•OH  |           | DMPO-•O <sub>2</sub> <sup>-</sup> |           | TEMPO-h <sup>+</sup> |           |
|------------|-----------|-----------|-----------------------------------|-----------|----------------------|-----------|
|            | 5 min     | 10 min    | 5 min                             | 10 min    | 5 min                | 10 min    |
| Pyrochlore | 4.538e+13 | 6.734e+13 | 4.023e+14                         | 5.368e+14 | 5.721e+15            | 3.763e+15 |
| Perovskite | 5.402e+13 | 7.221e+13 | 5.634e+14                         | 6.607e+14 | 5.159e+15            | 3.538e+15 |
